# Supplementary material
Source: PubMed Central journal article supplement (PMC4834387)
Supplement: hdy20164x1.pdf [file hdy20164x1.pdf]

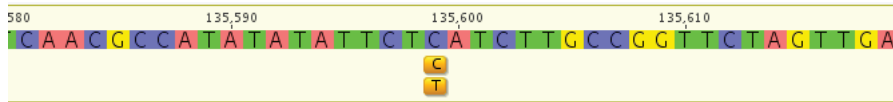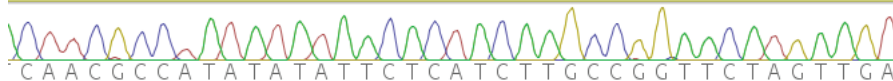

Chromosome 3 substitution C -> T, variant frequency 12%

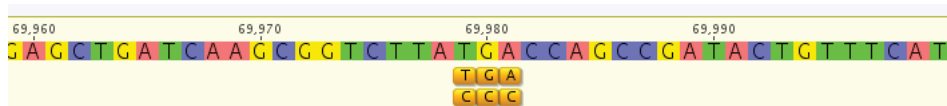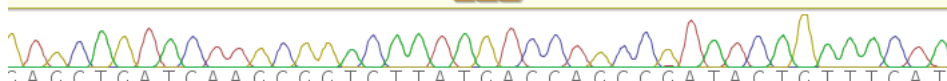

Chromosome 8 substitution TCA -> CCC, variant frequency 19%

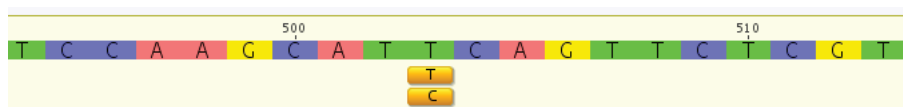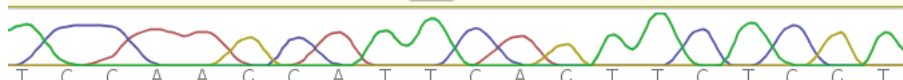

Chromosome 9 substitution T -> C, variant frequency 19%

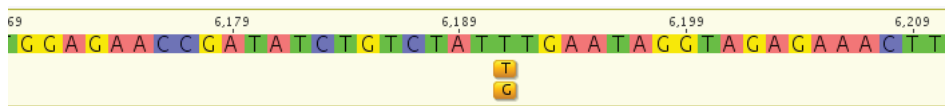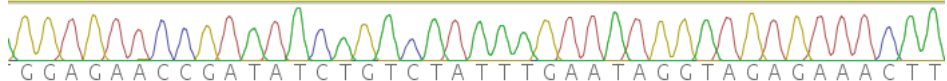

Chromosome 9 substitution T -> C, variant frequency 15%

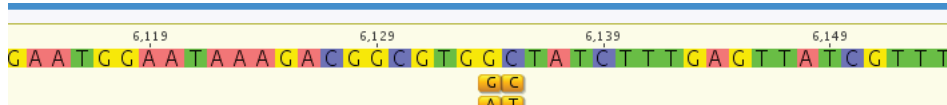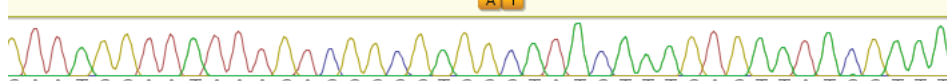

Chromosome 9 substitution GC -> AT, variant frequency 16%

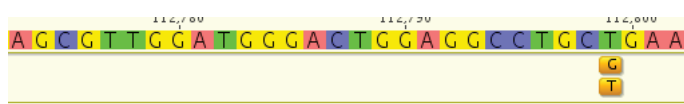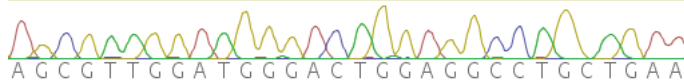

Chromosome 10 substitution T -> G, variant frequency 4%

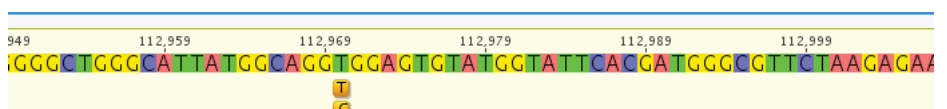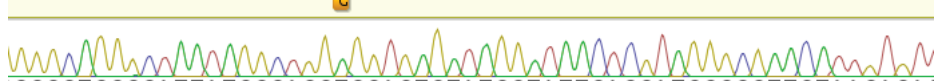

Chromosome 10 substitution T -> G, variant frequency 28%

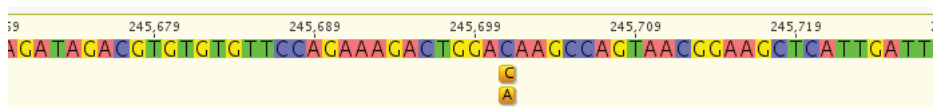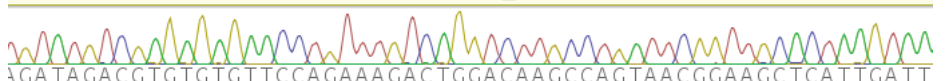

Chromosome 11 substitution G -> A, variant frequency 25%
