# Supplementary material
Source: PubMed Central journal article supplement (PMC4834387)

## A. CH06 locus in *Encephalitozoon* spp.

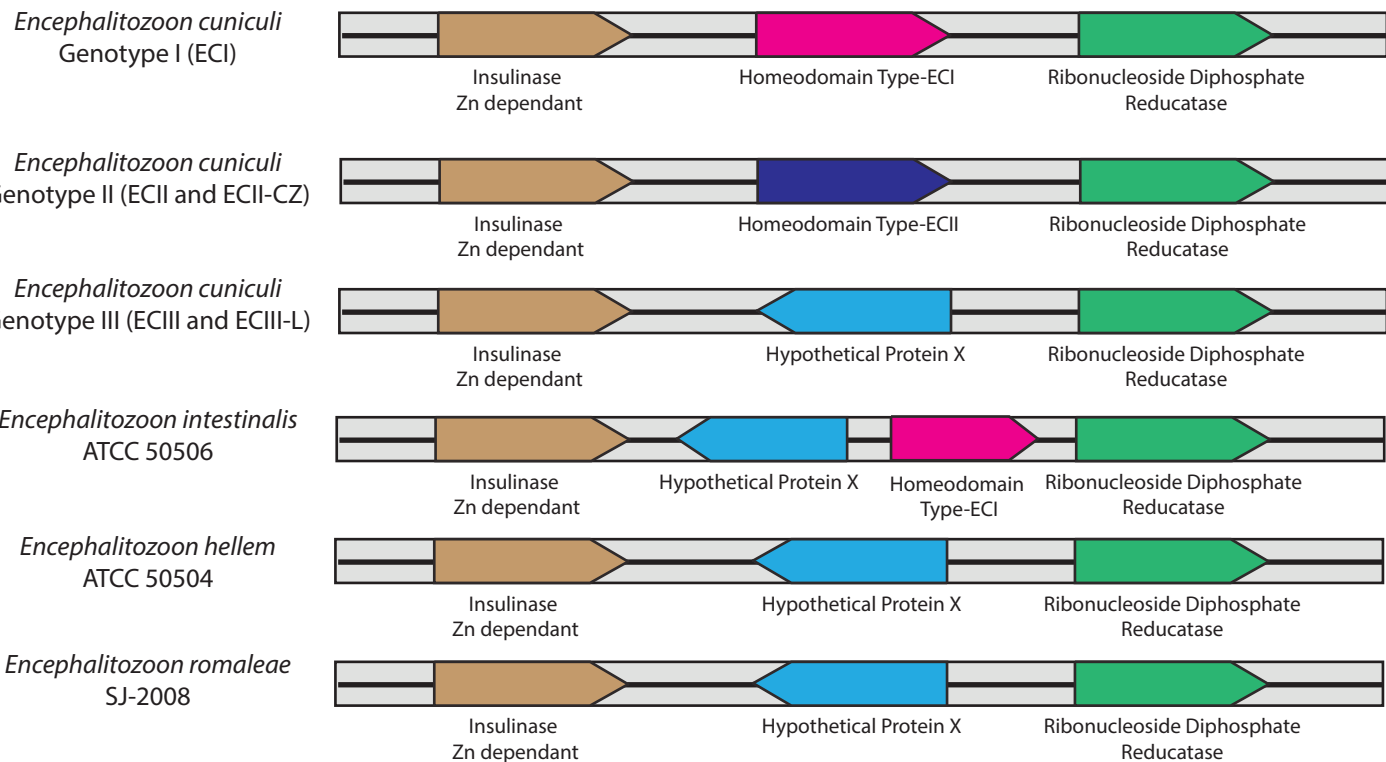

## C. ML Phylogeny of Homeodomains found in *Encephalitozoon* and *Ordospora*

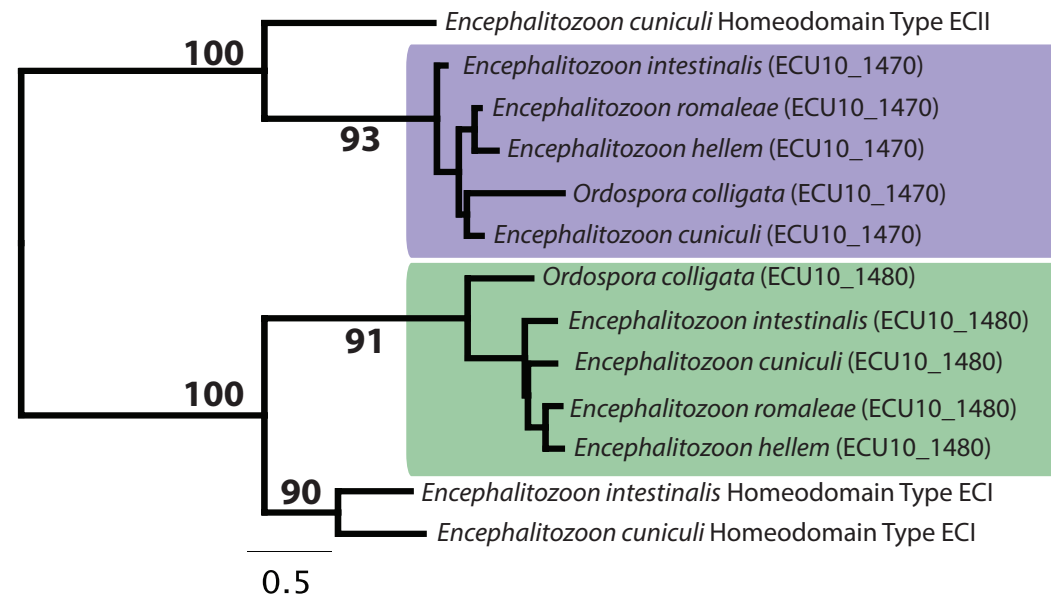

## B. CH010 locus in *Encephalitozoon* spp. compared to *Ordospora colligata* contig JOKQ01000005

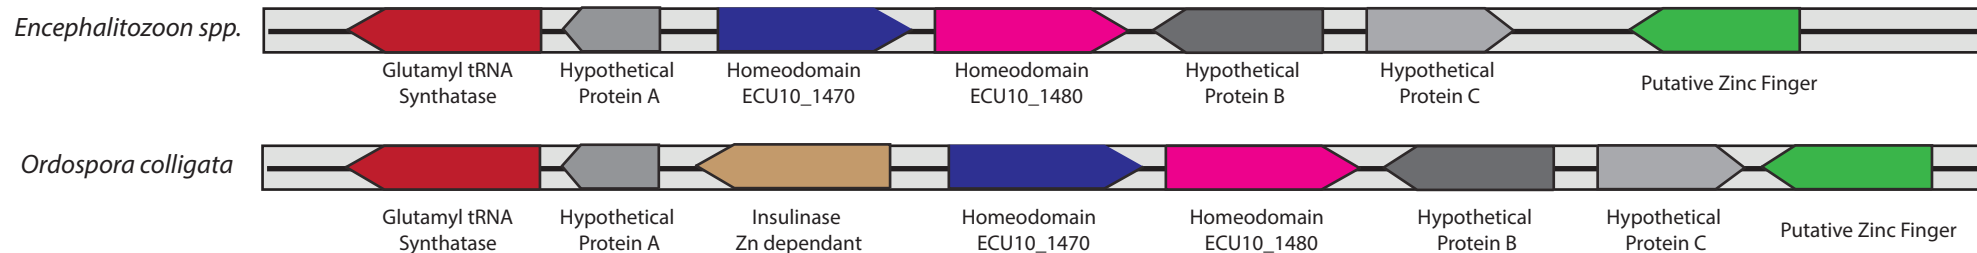

Supplement: hdy20164x4.pdf [file hdy20164x4.pdf]
