# Supplementary material
Source: PubMed Central journal article supplement (PMC4834387)

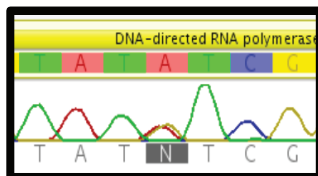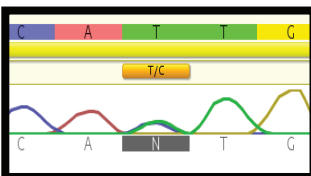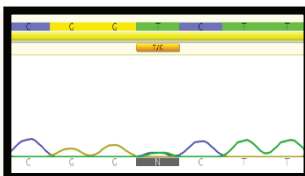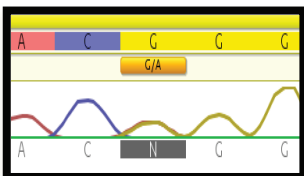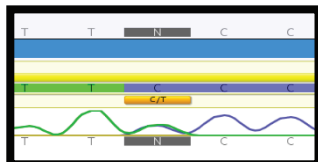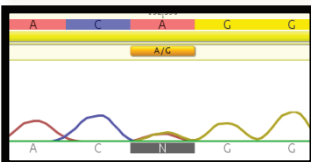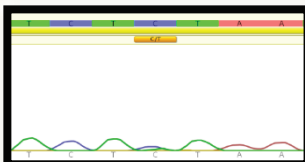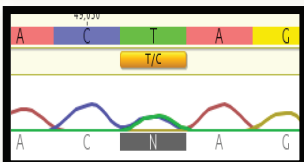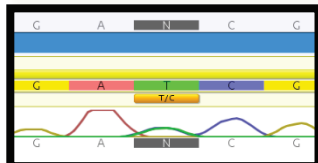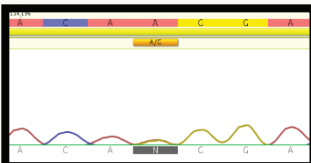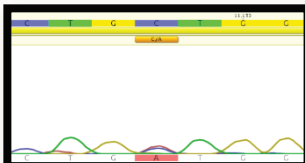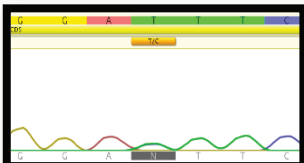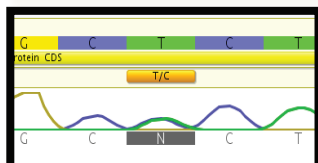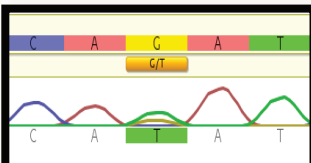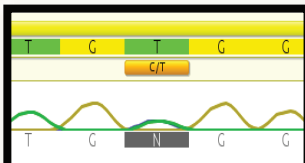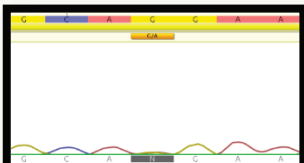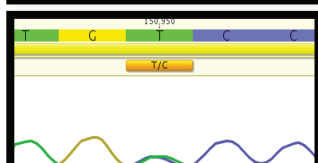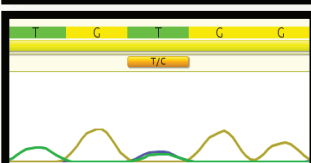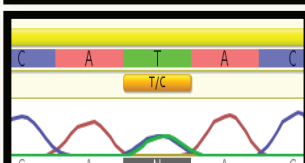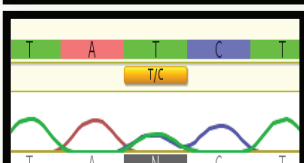

Supplement: hdy20164x2.pdf [file hdy20164x2.pdf]

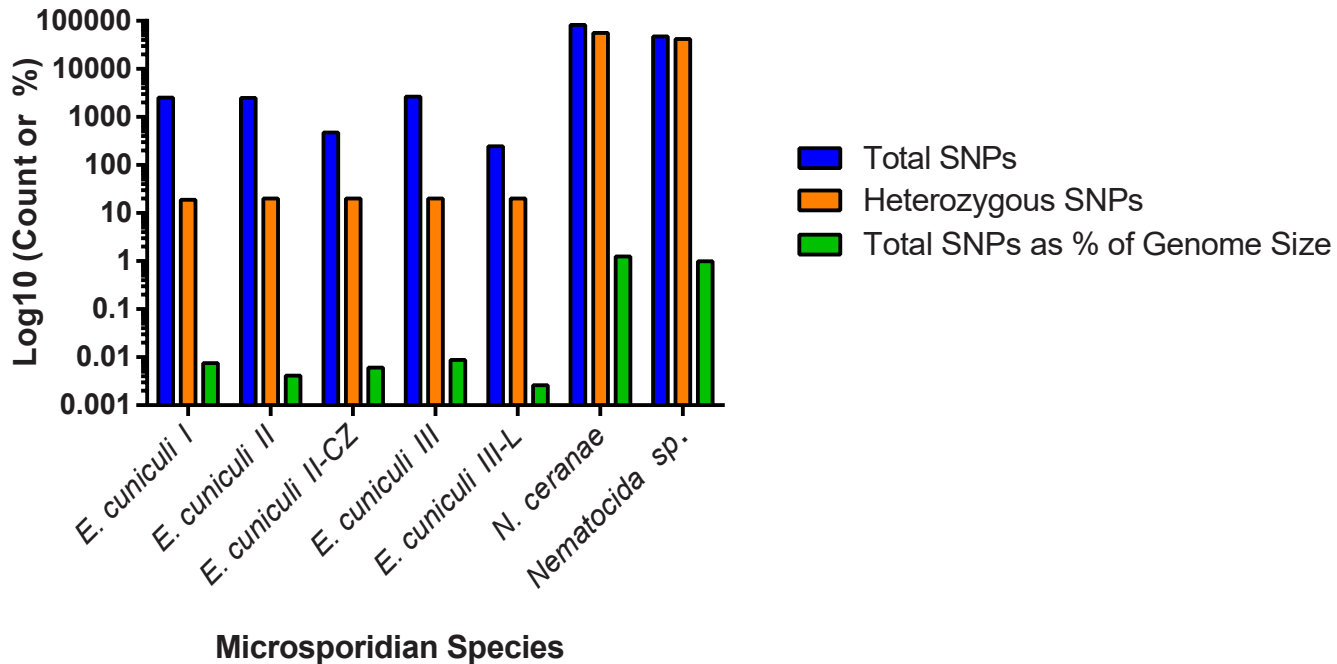

Supplement: hdy20164x3.pdf [file hdy20164x3.pdf]
